# Supplementary material
Source: PubMed Central journal article supplement (PMC7050285)
Supplement: NIHMS1562253-supplement-Supplemental_material.pdf [file NIHMS1562253-supplement-Supplemental_material.pdf]

## Supplementary Materials for

### **Increased soluble TREM2 in cerebrospinal fluid is associated with reduced cognitive and clinical decline in Alzheimer's disease**

Michael Ewers\*, Nicolai Franzmeier, Marc Suárez-Calvet, Estrella Morenas-Rodriguez, Miguel Angel Araque Caballero, Gernot Kleinberger, Laura Piccio, Carlos Cruchaga, Yuetiva Deming, Martin Dichgans, John Q. Trojanowski, Leslie M. Shaw, Michael W. Weiner, Christian Haass\*, for the Alzheimer's Disease Neuroimaging Initiative

\*Corresponding author. Email: michael.ewers@med.uni-muenchen.de (M.E.);  
christian.haass@mail03.med.uni-muenchen.de (C.H.)

Published 28 August 2019, *Sci. Transl. Med.* **11**, eaav6221 (2019)  
DOI: 10.1126/scitranslmed.aav6221

#### **This PDF file includes:**

- Fig. S1. CSF sTREM2 and CSF sTREM2 to p-tau<sub>181</sub> ratio per group.
- Fig. S2. Selection of the final subject group.
- Fig. S3. Effect of CSF sTREM2 on changes in cognition in clinical subgroups.
- Fig. S4. Effect of CSF sTREM2 measurements on hippocampal changes in MCI A+T+.
- Table S1. Regression analyses with additional control for CSF total tau.
- Table S2. Regression analyses with additional control for hippocampus volume.

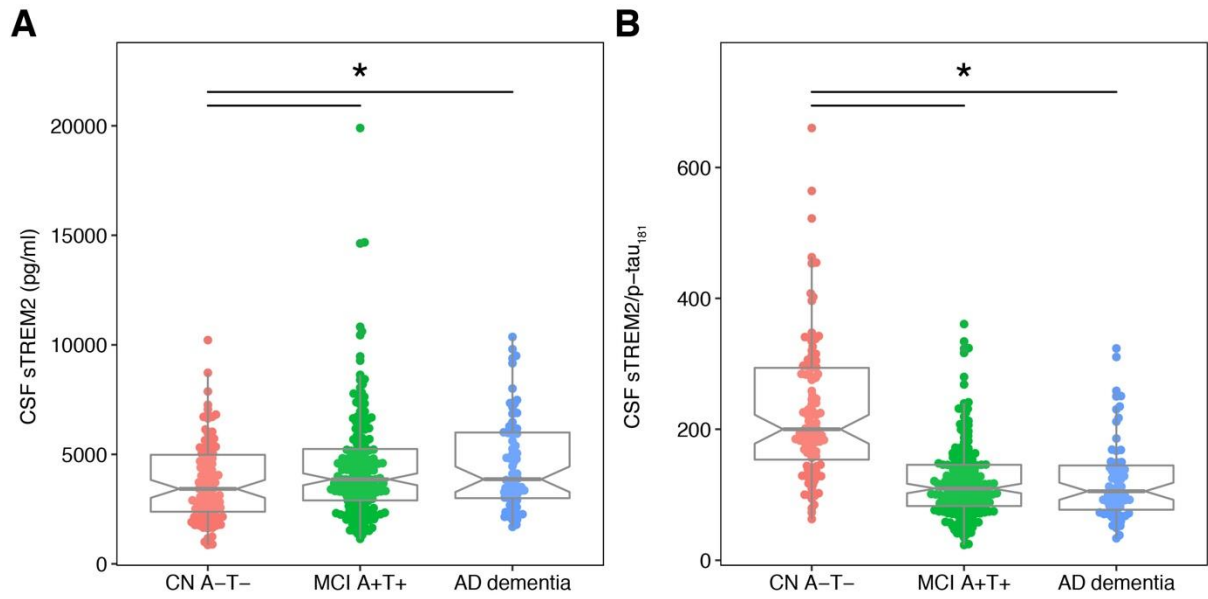

**Fig. S1. CSF sTREM2 and CSF sTREM2 to p-tau<sub>181</sub> ratio per group.** The boxplots show the concentrations of CSF sTREM2 (A) and CSF sTREM2 to p-tau<sub>181</sub> (B) for each diagnostic group. After removal of 3 outliers of CSF sTREM2 in the MCI A+T+ group, the CSF sTREM2 level was still significantly higher in the MCI A+T+ group compared to CN A-T-. The asterisk indicates  $p < 0.05$  for group differences tested by ANCOVA and post-hoc Tukey-test.

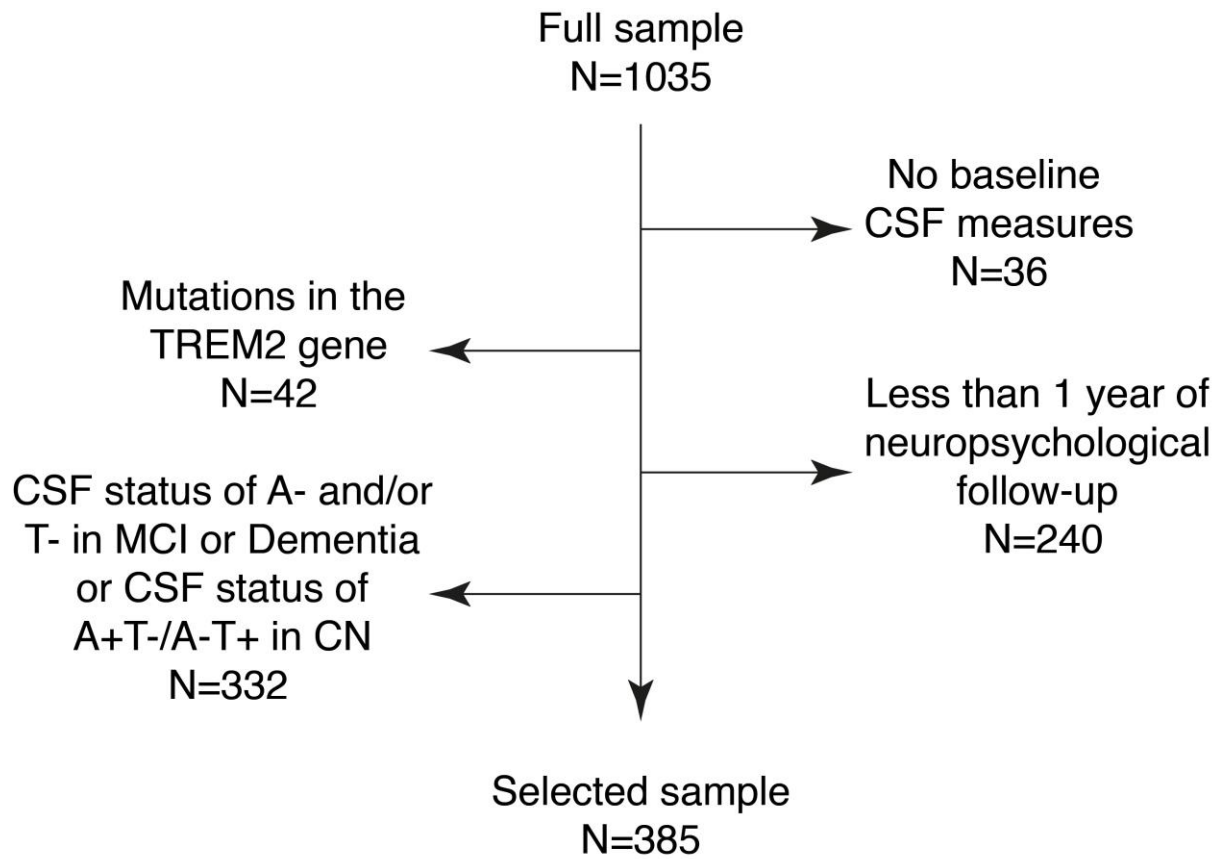

**Fig. S2. Selection of the final subject group.** Flow chart showing the exclusion of subjects from the full sample of 1035 subjects using CSF sTREM2 measurements.

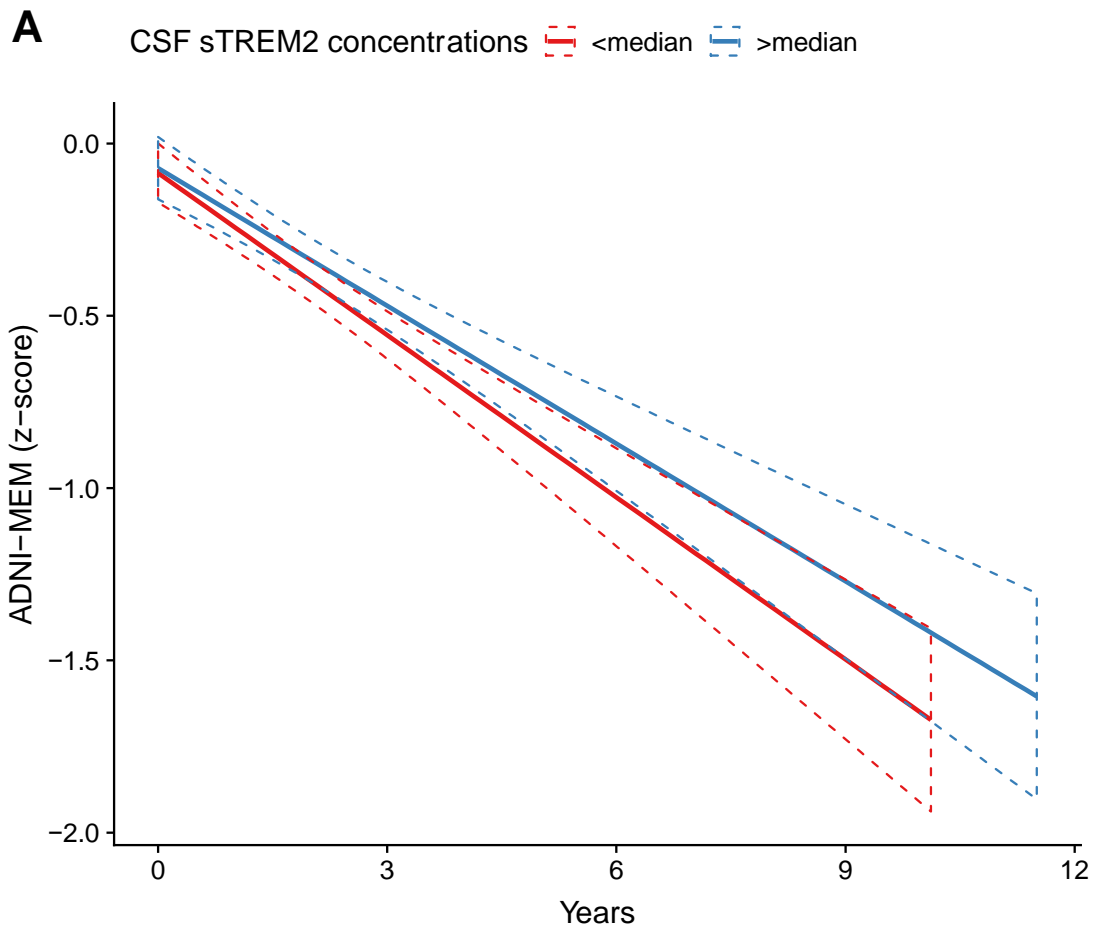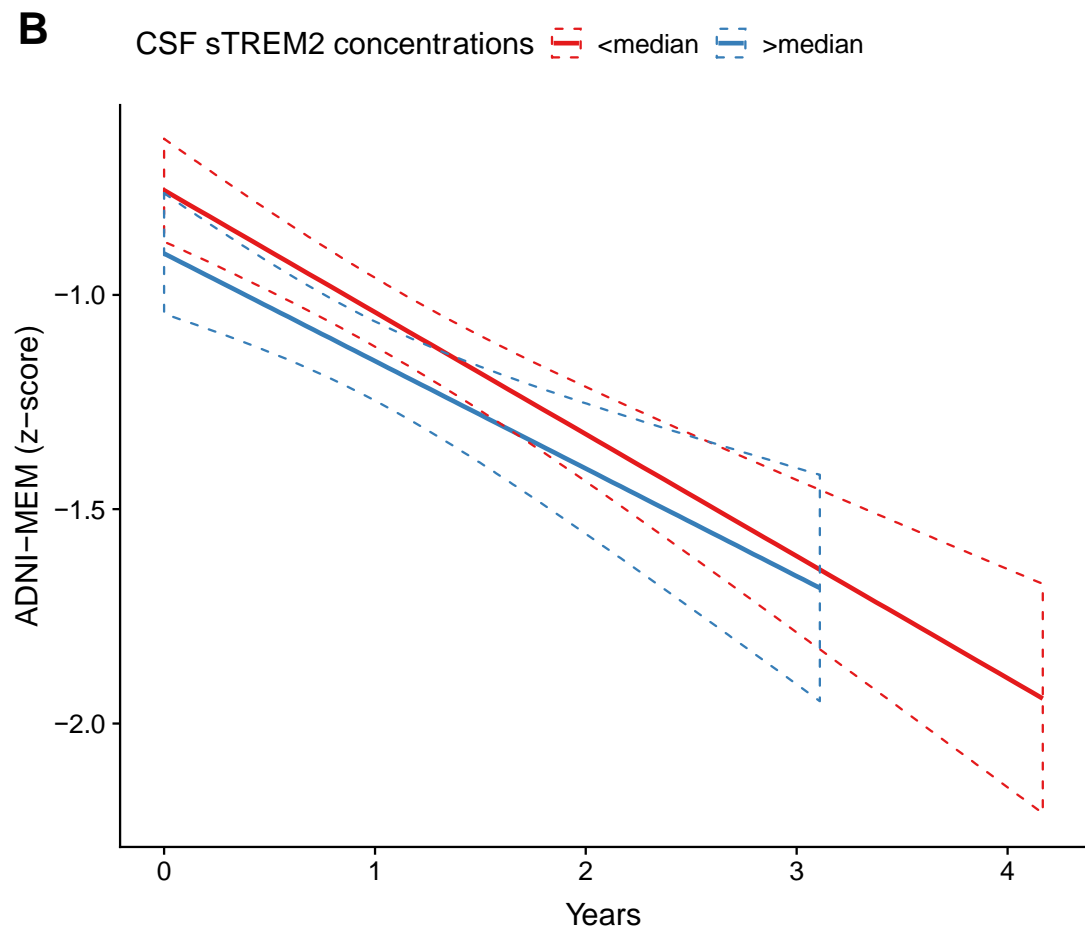

**Fig. S3. Effect of CSF sTREM2 on changes in cognition in clinical subgroups.** Regression plot showing the change in episodic memory as a function of CSF sTREM2 concentrations in the MCI A+T+ (A, n = 184) and AD dementia A+T+ (B, n = 66) subgroups tested by linear mixed effects regression analyses.

**A**CSF sTREM2 concentrations - - <median - - >median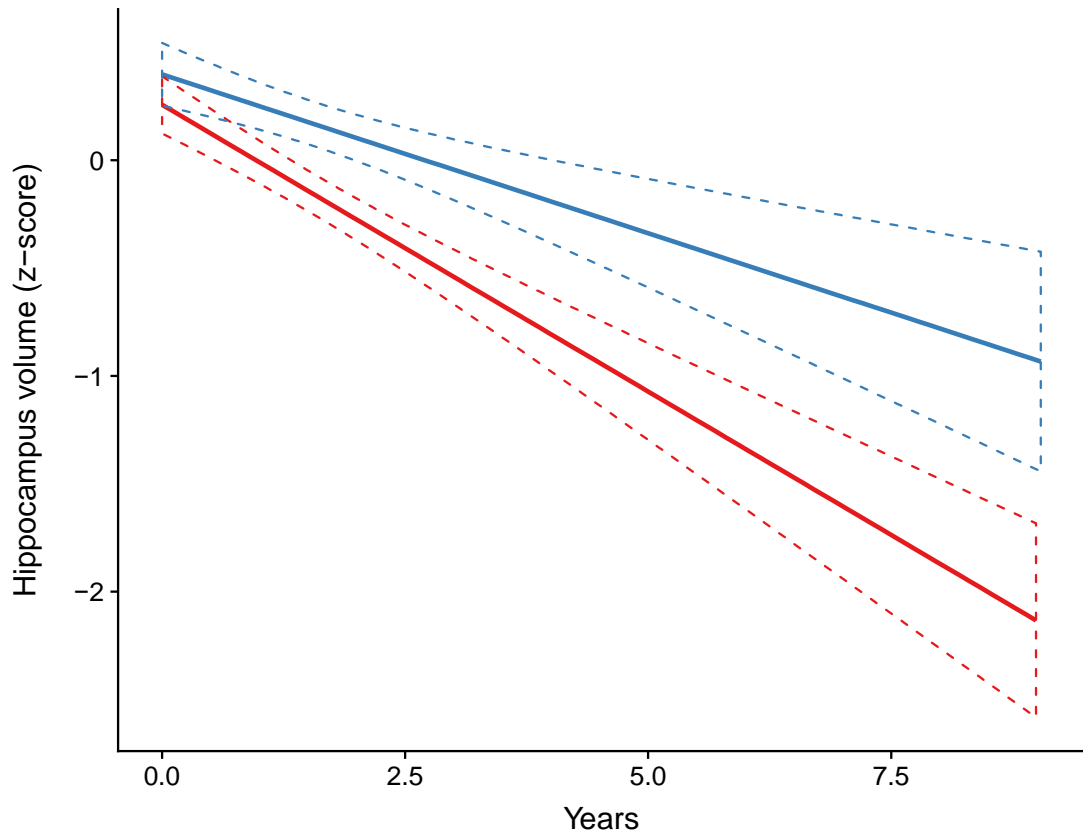**B**CSF sTREM2 to p-tau ratio - - <median - - >median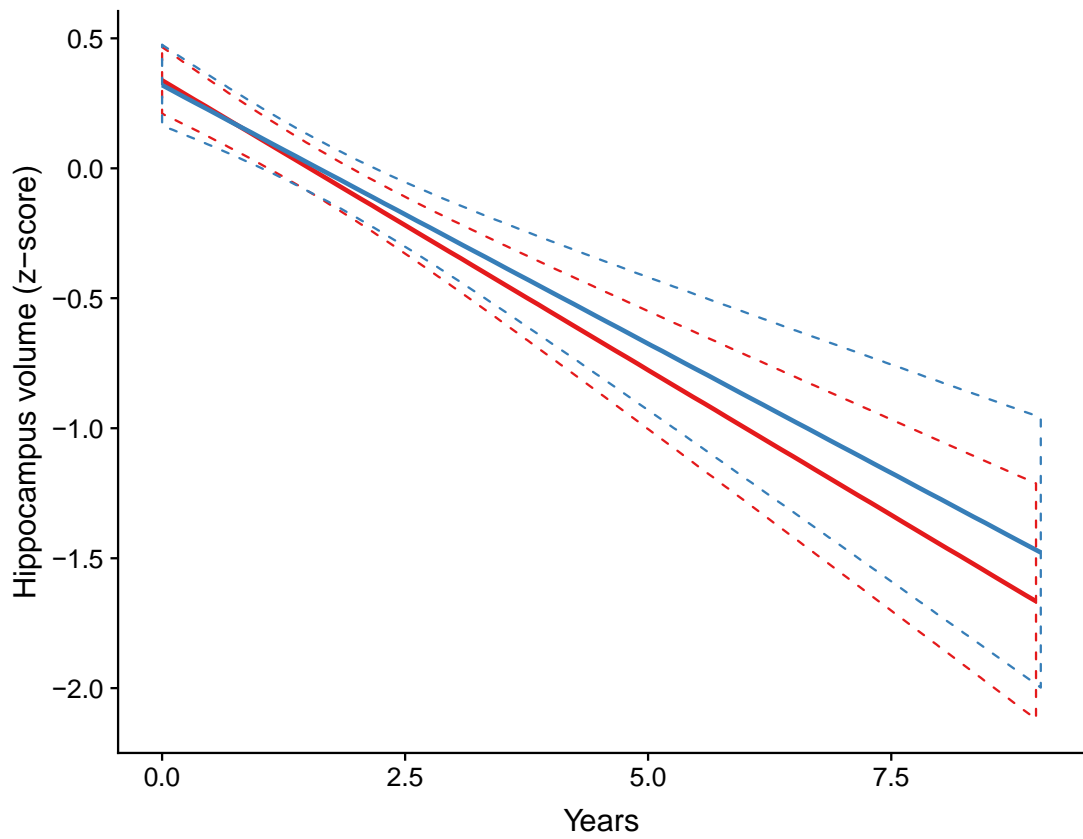

**Fig. S4. Effect of CSF sTREM2 measurements on hippocampal changes in MCI A+T+.** Regression plot showing the change in hippocampus volume change as a function of CSF sTREM2 concentrations (A) and CSF sTREM2 to p-tau<sub>181</sub> ratio (B) in the MCI A+T+ (A, n = 134) group as tested in mixed linear regression analyses.

**Table S1. Regression analyses with additional control for CSF total tau.** Regression statistics are shown for the effects of CSF sTREM2 on the rate of change in ADNI-MEM, ADAS-cog and hippocampal volume, *controlled for CSF total tau* in addition to CSF A $\beta_{1-42}$ , and CSF p-tau<sub>181</sub>.

| ADNI-MEM           | Interaction Term        | B (SE)         | 95% CI        | T-value | Cohens d | p      | p-perm. |
|--------------------|-------------------------|----------------|---------------|---------|----------|--------|---------|
| CN A-T-            | CSF sTREM2 x Time       | 0.030 (0.047)  | -0.060;0.120  | <1      | NA       | 0.530  | 0.500   |
|                    | CSF sTREM2/p-tau x Time | 0.039 (0.043)  | -0.045;0.123  | <1      | NA       | 0.371  | 0.346   |
| All A+T+           | CSF sTREM2 x Time       | 0.074 (0.022)  | 0.031;0.116   | 3.380   | 0.45     | <0.001 | 0.011   |
|                    | CSF sTREM2/p-tau x Time | 0.079 (0.021)  | 0.039;0.120   | 3.843   | 0.49     | <0.001 | 0.003   |
| MCI A+T+           | CSF sTREM2 x Time       | 0.077 (0.028)  | 0.023;0.130   | 2.790   | 0.45     | 0.006  | 0.036   |
|                    | CSF sTREM2/p-tau x Time | 0.085 (0.026)  | 0.035;0.135   | 3.331   | 0.52     | 0.001  | 0.009   |
| AD Dementia        | CSF sTREM2 x Time       | 0.048 (0.023)  | 0.005;0.092   | 2.100   | 0.59     | 0.041  | 0.043   |
|                    | CSF sTREM2/p-tau x Time | 0.057 (0.024)  | 0.011;0.104   | 2.365   | 0.66     | 0.022  | 0.030   |
| ADAS13             | Interaction Term        | B (SE)         | 95% CI        | T-value | Cohens d | p      |         |
| CN A-T-            | CSF sTREM2 x Time       | 0.092 (0.049)  | -0.006;0.187  | 1.869   | NA       | 0.070  | 0.086   |
|                    | CSF sTREM2/p-tau x Time | 0.071 (0.044)  | -0.015;0.157  | 1.623   | NA       | 0.116  | 0.164   |
| All A+T+           | CSF sTREM2 x Time       | -0.079 (0.036) | -0.149;-0.001 | -2.226  | 0.29     | 0.027  | 0.050   |
|                    | CSF sTREM2/p-tau x Time | -0.083 (0.034) | -0.149;-0.018 | -2.481  | 0.32     | 0.014  | 0.033   |
| MCI A+T+           | CSF sTREM2 x Time       | -0.083 (0.046) | -0.172;0.001  | -1.810  | NA       | 0.072  | 0.172   |
|                    | CSF sTREM2/p-tau x Time | -0.098 (0.042) | -0.181;-0.016 | -2.317  | 0.36     | 0.022  | 0.036   |
| AD dementia        | CSF sTREM2 x Time       | -0.046 (0.054) | -0.150;0.056  | <1      | NA       | 0.396  | 0.373   |
|                    | CSF sTREM2/p-tau x Time | -0.040 (0.057) | -0.151;0.070  | <1      | NA       | 0.486  | 0.442   |
| Hippocampus Volume | Interaction Term        | B (SE)         | 95% CI        | T-value | Cohens d | p      |         |
| CN A-T-            | CSF sTREM2 x Time       | -0.001 (0.014) | -0.036;0.017  | <1      | NA       | 0.484  | 0.428   |
|                    | CSF sTREM2/p-tau x Time | -0.005 (0.013) | -0.030;0.020  | <1      | NA       | 0.680  | 0.646   |
| All A+T+           | CSF sTREM2 x Time       | 0.024 (0.010)  | 0.004;0.043   | 2.314   | 0.39     | 0.022  | 0.035   |
|                    | CSF sTREM2/p-tau x Time | 0.022 (0.009)  | 0.003;0.040   | 2.308   | 0.38     | 0.022  | 0.036   |
| MCI A+T+           | CSF sTREM2 x Time       | 0.035 (0.014)  | 0.009;0.061   | 2.602   | 0.49     | 0.011  | 0.012   |
|                    | CSF sTREM2/p-tau x Time | 0.030 (0.012)  | 0.007 (0.054) | 2.487   | 0.47     | 0.014  | 0.016   |
| AD dementia        | CSF sTREM2 x Time       | -0.007 (0.024) | -0.051;0.037  | <1      | NA       | 0.760  | 0.805   |
|                    | CSF sTREM2/p-tau x Time | -0.002 (0.020) | -0.041;0.036  | <1      | NA       | 0.906  | 0.916   |

All models are controlled for age, gender, education, CSF p-tau<sub>181</sub> x Time, CSF total-tau x Time, CSF A $\beta_{1-42}$  x Time, CSF sTREM2, CSF A $\beta_{1-42}$ , CSF total-tau, CSF p-tau<sub>181</sub> (fixed effects), plus random slope (i.e. Time) and intercept. Regular p-values are assessed using Satterthwaite's method. For non-parametric confirmation of results, p-values were further assessed using permutation testing with 1000 iterations (p-perm.). B = regression coefficient, SE = standard error, 95% CI = 95% confidence interval, T-value = t-test statistic, Cohen's d = effect size *d*, p-perm. = p-value from permutation test



**Table S2. Regression analyses with additional control for hippocampus volume.** Regression statistics are shown for the effects of CSF sTREM2 on the rate of change in ADNI-MEM, ADAS-cog and hippocampal volume, *controlled for hippocampus volume* in addition to CSF A $\beta_{1-42}$ , and CSF p-tau<sub>181</sub>.

| ADNI-MEM    | Interaction Term        | B (SE)         | 95% CI        | T-value | Cohens d | p      | p-perm. |
|-------------|-------------------------|----------------|---------------|---------|----------|--------|---------|
| CN A-T-     | CSF sTREM2 x Time       | 0.054 (0.049)  | -0.040;0.148  | 1.101   | NA       | 0.275  | 0.245   |
|             | CSF sTREM2/p-tau x Time | 0.054 (0.046)  | -0.035;0.143  | 1.165   | NA       | 0.249  | 0.200   |
| All A+T+    | CSF sTREM2 x Time       | 0.074 (0.024)  | 0.026;0.121   | 3.039   | 0.43     | 0.003  | 0.009   |
|             | CSF sTREM2/p-tau x Time | 0.088 (0.022)  | 0.045;0.131   | 3.950   | 0.53     | <0.001 | <0.001  |
| MCI A+T+    | CSF sTREM2 x Time       | 0.084 (0.031)  | 0.023;0.145   | 2.686   | 0.46     | 0.008  | 0.032   |
|             | CSF sTREM2/p-tau x Time | 0.102 (0.028)  | 0.047;0.157   | 3.625   | 0.60     | <0.001 | 0.003   |
| AD Dementia | CSF sTREM2 x Time       | 0.024 (0.028)  | -0.028;0.080  | <1      | NA       | 0.383  | 0.425   |
|             | CSF sTREM2/p-tau x Time | 0.036 (0.026)  | -0.014;0.087  | 1.339   | NA       | 0.168  | 0.160   |
| ADAS13      | Interaction Term        | B (SE)         | 95% CI        | T-value | Cohens d | p      | p-perm. |
| CN A-T-     | CSF sTREM2 x Time       | 0.028 (0.046)  | -0.060;0.115  | <1      | NA       | 0.539  | 0.55    |
|             | CSF sTREM2/p-tau x Time | 0.025 (0.042)  | -0.057;0.106  | <1      | NA       | 0.556  | 0.618   |
| All A+T+    | CSF sTREM2 x Time       | -0.083 (0.040) | -0.160;-0.005 | -2.084  | 0.29     | 0.038  | 0.049   |
|             | CSF sTREM2/p-tau x Time | -0.106 (0.036) | -0.176;-0.035 | -2.935  | 0.40     | 0.004  | 0.025   |
| MCI A+T+    | CSF sTREM2 x Time       | -0.102 (0.053) | -0.205;0.001  | -1.940  | NA       | 0.054  | 0.150   |
|             | CSF sTREM2/p-tau x Time | -0.126 (0.047) | -0.218;-0.033 | -2.654  | 0.43     | 0.009  | 0.040   |
| AD dementia | CSF sTREM2 x Time       | 0.005 (0.061)  | -0.112;0.121  | <1      | NA       | 0.939  | 0.915   |
|             | CSF sTREM2/p-tau x Time | -0.028 (0.058) | -0.140;0.084  | <1      | NA       | 0.632  | 0.605   |

All models are controlled for age, gender, education, CSF p-tau<sub>181</sub> x Time, Hippocampal volume x Time, CSF A $\beta_{1-42}$  x Time, CSF sTREM2, CSF A $\beta_{1-42}$ , Hippocampal volume, CSF p-tau<sub>181</sub> (fixed effects), plus random slope (Time) and intercept. Regular p-values are assessed using Satterthwaite's method. For non-parametric confirmation of results, p-values were further assessed using permutation testing with 1000 iterations (p-perm.). B = regression coefficient, SE = standard error, 95% CI = 95% confidence interval, T-value = t-test statistic, Cohen's d = effect size *d*, p-perm. = p-value from permutation test
